# Supplementary material for: Synthesis of a new chlorin photosensitizer for photodynamic therapy against colon cancer
Source: Royal Society of Chemistry journal article supplement (doi:10.1039/d2qm00046f), 2022-01-01
Supplement: d2qm00046f1.pdf [file d2qm00046f1.pdf]

## Synthesis of a new chlorin photosensitizer for photodynamic therapy against colon cancer

Jianjiao Chen<sup>†a</sup>, Zhiqiang Chen<sup>†b</sup>, Litao Tan<sup>c</sup>, Jie Yang<sup>c</sup>, Lei Shen<sup>c\*</sup>, Jun Deng<sup>d\*</sup>, Xin Jiang<sup>b\*</sup>,  
Dengfeng Zou<sup>a\*</sup>

a. School of Pharmacy, Guilin Medical University, Guilin, 541004, Guangxi, P.R. China. Email, [zdf1226@126.com](mailto:zdf1226@126.com).

b. Affiliated Hospital of Guilin Medical University, Guilin 541000, Guangxi, P.R. China. Email: [jiangxin402@163.com](mailto:jiangxin402@163.com).

c. Department of Materials Engineering, Jiangsu Key Laboratory of Advanced Functional Materials, Changshu Institute of Technology, Changshu 215500, P.R. China. Email: [leishen@cslg.edu.cn](mailto:leishen@cslg.edu.cn).

d. Department of thoracic surgery, Kunshan Hospital Affiliated to Jiangsu University, Kunshan, 215300, P.R. China. Email: [yaya850830@126.com](mailto:yaya850830@126.com).

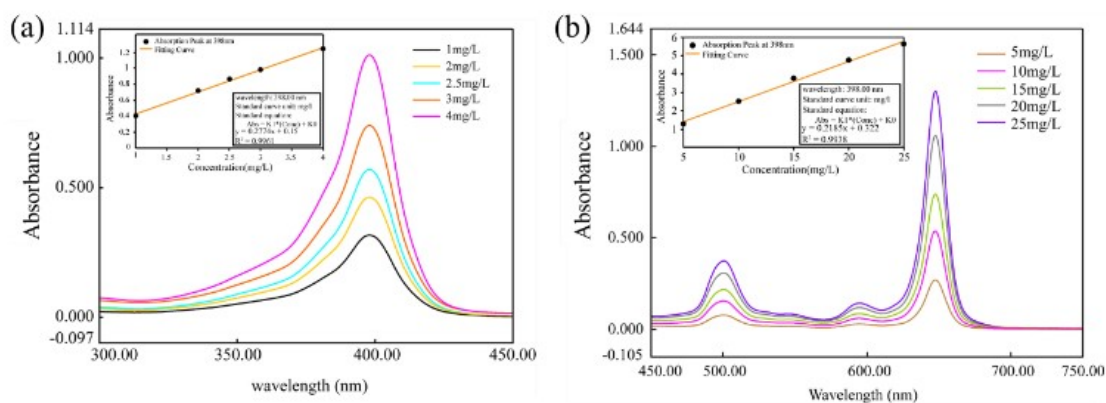

Fig. S1 UV-vis spectra of HCE6 under different wavelength: (a) Soret band. (b) Q band.

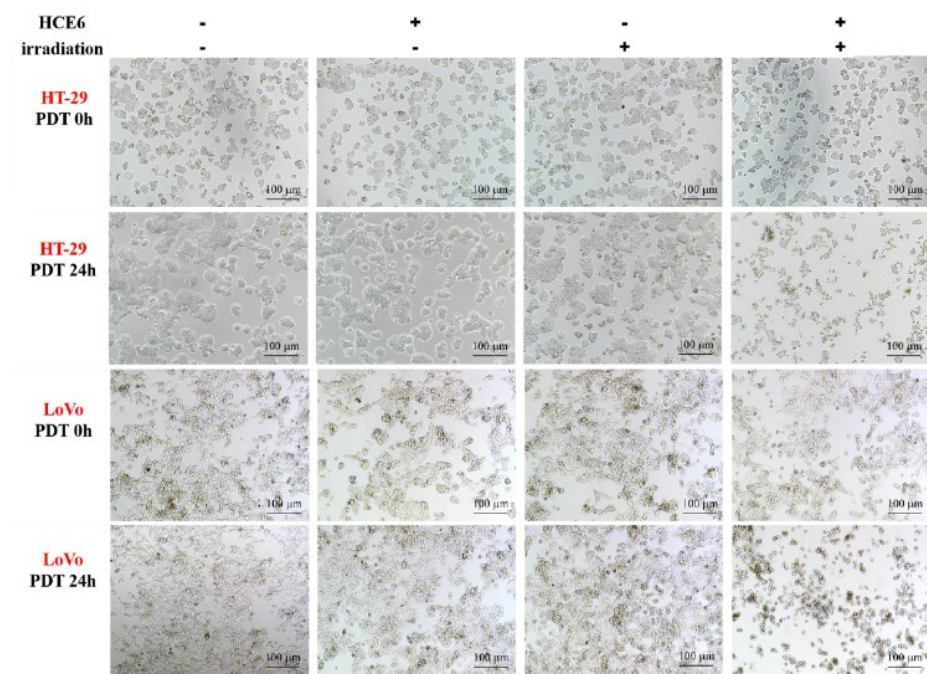

Fig. S2 Morphological observation of HT-29 cells and LoVo cells.

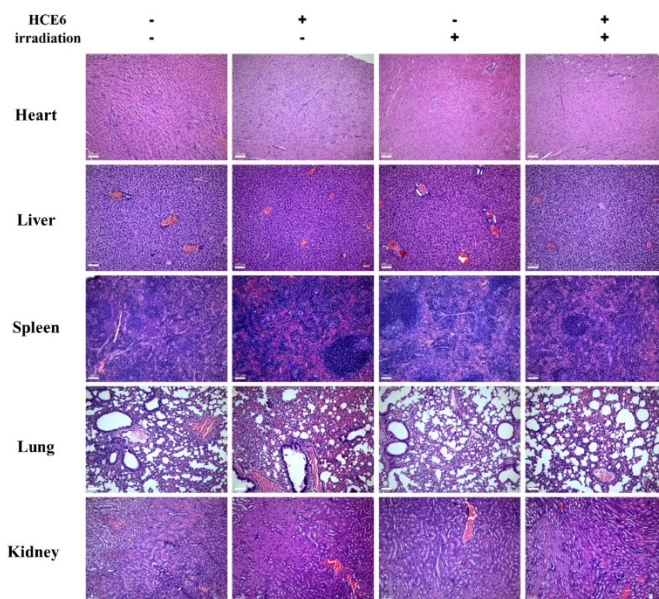

Fig. S3 H&E stained pictures of the major organs: heart, liver, spleen, lung and kidney.
